# Supplementary material for: Meta-Regression Analysis of Placebo Response in Antipsychotic Trials, 1970–2010
Source: Atypon-hosted journal article supplement (doi:10.1176/appi.ajp.2013.12030315), 2013-07-30
Supplement: 1335_ds001.pdf [file 1335_ds001.pdf]

## Supplementary Tables and Figures

**Table S1. Study Characteristics**

| Study              | Placebo, n (ITT) | Antipsychotics, n (ITT) | Antipsychotics                 | Mean Age | Mean CGI | Study Completion, % | Duration of illness, year | Gender, % Male | Treatment Duration, weeks |
|--------------------|------------------|-------------------------|--------------------------------|----------|----------|---------------------|---------------------------|----------------|---------------------------|
| Clark 1970         | 14               | 15                      | Chlorpromazine 1000 mg/d (max) | 37.4     | 4.35     | 95.5                | 24.0                      | 7.1            | 12.0                      |
| Clark 1971         | 18               | 19                      | Thioridazine 400 mg            | 32.3     | 4.06     | 85.3                |                           | 29.4           | 6.0                       |
| Clark 1972         | 18               | 18                      | Loxapine 100mg/d (max)         | 39.9     | 4.81     | 90.9                |                           | 44.4           | 12.0                      |
| Serafetinides 1972 | 13               | 15                      | Clopenthixol 250 mg (max)      | 43.9     | 5.23     | 93.0                | 24.0                      | 46.2           | 12.0                      |
| Charalampous 1974  | 19               | 20                      | Thiothixene 60 mg/d (max)      | 25.9     |          | 68.3                | 2.5                       | 96.7           | 4.0                       |
| Van Der Velde 1975 | 25               | 24                      | Loxapine 100 mg/d              | 25.6     | 5.02     | 85.5                |                           | 52.0           | 6.0                       |
| Clark 1975         | 12               | 12                      | Trifluoperazine 50 mg/d (max)  | 36.9     | 4.5      | 84.1                | 9.5                       | 61.5           | 4.0                       |
| Chouinard 1975     | 24               | 24                      | Perphenazine 20 mg/d           | 39       | 4.1      | 83.3                |                           | 50.0           | 12.0                      |
| Peet 1981          | 18               | 16                      | Chlorpromazine 400 mg/d        | 51.3     | 3.75     | 60.4                |                           | 66.7           | 8.0                       |
| Cohen 1987         | 11               | 26                      | Piquindone 120 mg/d (max)      | 36.1     |          | 66.7                | 12.1                      | 100.0          | 2.0                       |
| Chouinard 1990     | 20               | 20                      | Remoxipride 600 mg/d (max)     | 37.8     | 6        | 69.4                | 13.4                      | 61.9           | 4.0                       |
| Montgomery 1992    | 23               | 27                      | Thioridazine 400 mg            | 37.9     |          | 59.4                |                           | 87.0           | 4.0                       |
| Chouinard 1993     | 22               | 22                      | Risperidone 6 mg/d             | 37       | 4.5      | 51.9                | 14.0                      | 71.1           | 8.0                       |
| Marder 1994        | 64               | 63                      | Risperidone 6 mg/d             | 37.1     | 3.7      | 47.2                | 15.2                      | 89.1           | 8.0                       |
| Fabre 1995         | 4                | 8                       | Quetiapine 25 to 250 mg/d      | 35       | 4.3      | 91.7                |                           | 100.0          | 3.0                       |
| Taiminen 1996      | 45               |                         | N/A                            | 43.2     | 5        | 88.9                | 16.5                      | 64.4           | 12.0                      |
| Borison 1996       | 53               | 53                      | Quetiapine 75-750 mg/d         | 37       | 4.6      | 45.9                | 15.0                      | 90.9           | 6.0                       |
| Beasley 1996       | 62               | 65                      | Olanzapine 15/17.5 mg/d        | 35       | 4.9      | 41.5                |                           | 91.2           | 6.0                       |
| Van Kammen 1996    | 38               | 40                      | Sertindole 20 mg/d             | 37.1     | 4.8      | 51.2                | 13.8                      | 94.7           | 5.7                       |
| Beasley 1996       | 49               | 49                      | Olanzapine 10 mg/d             | 36       | 5        | 27.0                | 14.0                      | 65.3           | 6.0                       |
| Small 1997         | 92               | 92                      | Quetiapine 750 mg/d            | 38       | 4.9      | 44.4                | 16.0                      | 66.7           | 6.0                       |
| Zimbroy 1997       | 71               | 65                      | Sertindole 20 mg/d             | 38.7     | 4.7      | 51.3                | 16.6                      | 78.1           | 8.0                       |
| Arvanitis 1997     | 51               | 51                      | Quetiapine 600 mg/d            | 36       | 4.9      | 41.3                | 14.0                      | 80.4           | 5.7                       |
| Kramer 1997        | 12               | 26                      | L745,870 15 mg/d               | 42       | 5        | 57.9                |                           | 91.7           | 4.0                       |
| Keck 1998          | 47               | 41                      | Ziprasidone 120 mg/d           | 39       | 4.7      | 69.0                | 17.3                      | 85.4           | 4.0                       |
| Truffinet 1999     | 34               | 63                      | Fananserin 500 mg/d            | 38.9     | 4.6      | 28.9                | 16.0                      | 88.2           | 4.0                       |
| Daniel 1999        | 91               | 104                     | Ziprasidone 160 mg/d           | 37.2     | 4.8      | 55.0                | 22.5                      | 68.5           | 6.0                       |
| Cooper 2000        | 58               | 61                      | Zotepine 150-300 mg/d          | 41.6     | 4.1      | 45.4                | 13.2                      | 72.4           | 8.0                       |
| Cooper 2000        | 53               | 53                      | Zotepine 150-300 mg/d          | 36.3     | 4.85     | 56.0                |                           | 69.8           | 8.0                       |
| Kane 2002          | 106              | 102                     | Aripiprazole 15mg/d            | 38.5     | 4.9      | 59.9                | 16.0                      | 69.8           | 4.0                       |
| Arato 2002         | 71               | 67                      | Ziprasidone 160 mg/d           | 48.7     | 4.1      | 35.6                | 21.6                      | 83.1           | 6.0                       |
| Potkin 2003        | 103              | 98                      | Aripiprazole 20 mg/d           | 38.8     | 4.8      | 59.9                |                           | 70.9           | 4.0                       |
| Pigott 2003        | 149              | 148                     | Aripiprazole 15 mg/d           | 41.7     | 3.5      | 37.4                |                           | 58.1           | 6.0                       |
| Bai 2003           | 20               | 22                      | Risperidone 6 mg/d             | 51.4     |          | 85.7                |                           | 60.0           | 12.0                      |
| Cutler 2006        | 88               | 94                      | Aripiprazole 10 mg/d           | 42.9     | 4.7      | 53.1                | 18.3                      | 81.8           | 5.0                       |
| Potkin 2006        | 71               | 152                     | Risperidone 4-6 mg/d           | 36.1     | 5.4      | 71.5                |                           | 63.0           | 2.0                       |

|               |     |     |                        |      |       |      |      |      |     |
|---------------|-----|-----|------------------------|------|-------|------|------|------|-----|
| McEvoy 2007   | 107 | 106 | Aripiprazole 10 mg/d   | 41.2 | 4.6   | 33.8 | 16.7 | 76.9 | 6.0 |
| Kane 2007     | 126 | 129 | Paliperidone ER 12 mg  | 37.1 | 4.43  | 65.9 | 9.1  | 40.9 | 6.0 |
| Davidson 2007 | 120 | 113 | Paliperidone ER 12 mg  | 37.9 | 4.62  | 59.1 | 13.4 | 57.5 | 6.0 |
| Marder 2007   | 105 | 111 | Paliperidone ER 12 mg  | 41.6 | 4.445 | 43.2 |      | 74.0 | 6.0 |
| Kahn 2007     | 115 | 117 | Quetiapine XR 600 mg/d | 34.1 | 4.9   | 75.9 | 8.0  | 58.3 | 6.0 |
| Potkin 2007   | 62  | 60  | Asenapine 10 mg/d      | 42   | 4.6   | 40.1 |      | 79.0 | 6.0 |
| Casey 2008    | 114 | 111 | Bifeprunox 20 mg/d     | 40.8 | 4.54  | 30.9 |      | 75.4 | 6.0 |
| Meltzer 2008  | 351 | 240 | Paliperidone ER 12 mg  | 39   | 4.67  | 45.4 |      | 92.0 | 6.0 |
| Findling 2008 | 98  | 97  | Aripiprazole 30mg      | 15.4 | 4.6   | 84.8 | 1.5  | 61.0 | 6.0 |
| Potkin 2008   | 117 | 115 | Iloperidone 12 mg/d    | 39.3 |       | 37.2 |      | 70.9 | 6.0 |
| Potkin 2008   | 152 | 141 | Iloperidone 20-24 mg/d | 38.8 |       | 50.3 |      | 67.3 | 6.0 |
| Potkin 2008   | 152 | 149 | Iloperidone 10-16 mg/d | 39   |       | 58.1 |      | 58.8 | 6.0 |
| Canuso 2009   | 80  | 157 | Paliperidone ER        | 36.1 | 5.2   | 86.0 | 12.5 | 62.5 | 2.0 |
| Nakamura 2009 | 90  | 90  | Lurasidone 80 mg/d     | 41.9 | 4.8   | 43.8 |      | 77.8 | 6.0 |

**TABLE S2. Summary of Placebo Response Findings and Sensitivity Analyses**

|                                            | Number of studies (Study duration) | SMC (95%CI)                    | p-value          | Quality Rating | Q-statistics (df)  | p-value Heterogeneity |
|--------------------------------------------|------------------------------------|--------------------------------|------------------|----------------|--------------------|-----------------------|
| <b>Overall placebo response (unbiased)</b> | <b>50 (&lt;12 weeks)</b>           | <b>-0.332 (-0.444, -0.220)</b> | <b>&lt;0.001</b> | <b>3 to 7</b>  | <b>387.83 (49)</b> | <b>&lt;0.001</b>      |
| Sensitivity Analysis                       | 61 (<12 weeks)                     | -0.295 (-0.401, -0.188)        | <0.001           | 1 to 7         | 439.41 (60)        | <0.001                |

Studies were included in the primary analysis sample of 50 studies. Four long-term studies had available data on Week 6 to Week 12, which were extracted and included in the analysis (1-4). The study inclusion criteria were: 1) reported baseline and at least 1 post-baseline assessment (<12 weeks); 2) identified efficacy data using either the Brief Psychiatric Rating Scale (BPRS) or the Positive and Negative Syndrome Scale (PANSS) rating scales (for studies that reported results solely on a graphic basis, data were obtained directly from the published graphs); and, 3) met minimum study quality criteria (omnibus rating score >3 i.e., 'moderately poor' or better) (5). Two sensitivity analyses were conducted: one based on 61 studies, adding the 11 studies with an omnibus rating score of <2 (exceptionally poor or very poor).

Figure S1. Summary of Placebo Response (SMC) Findings

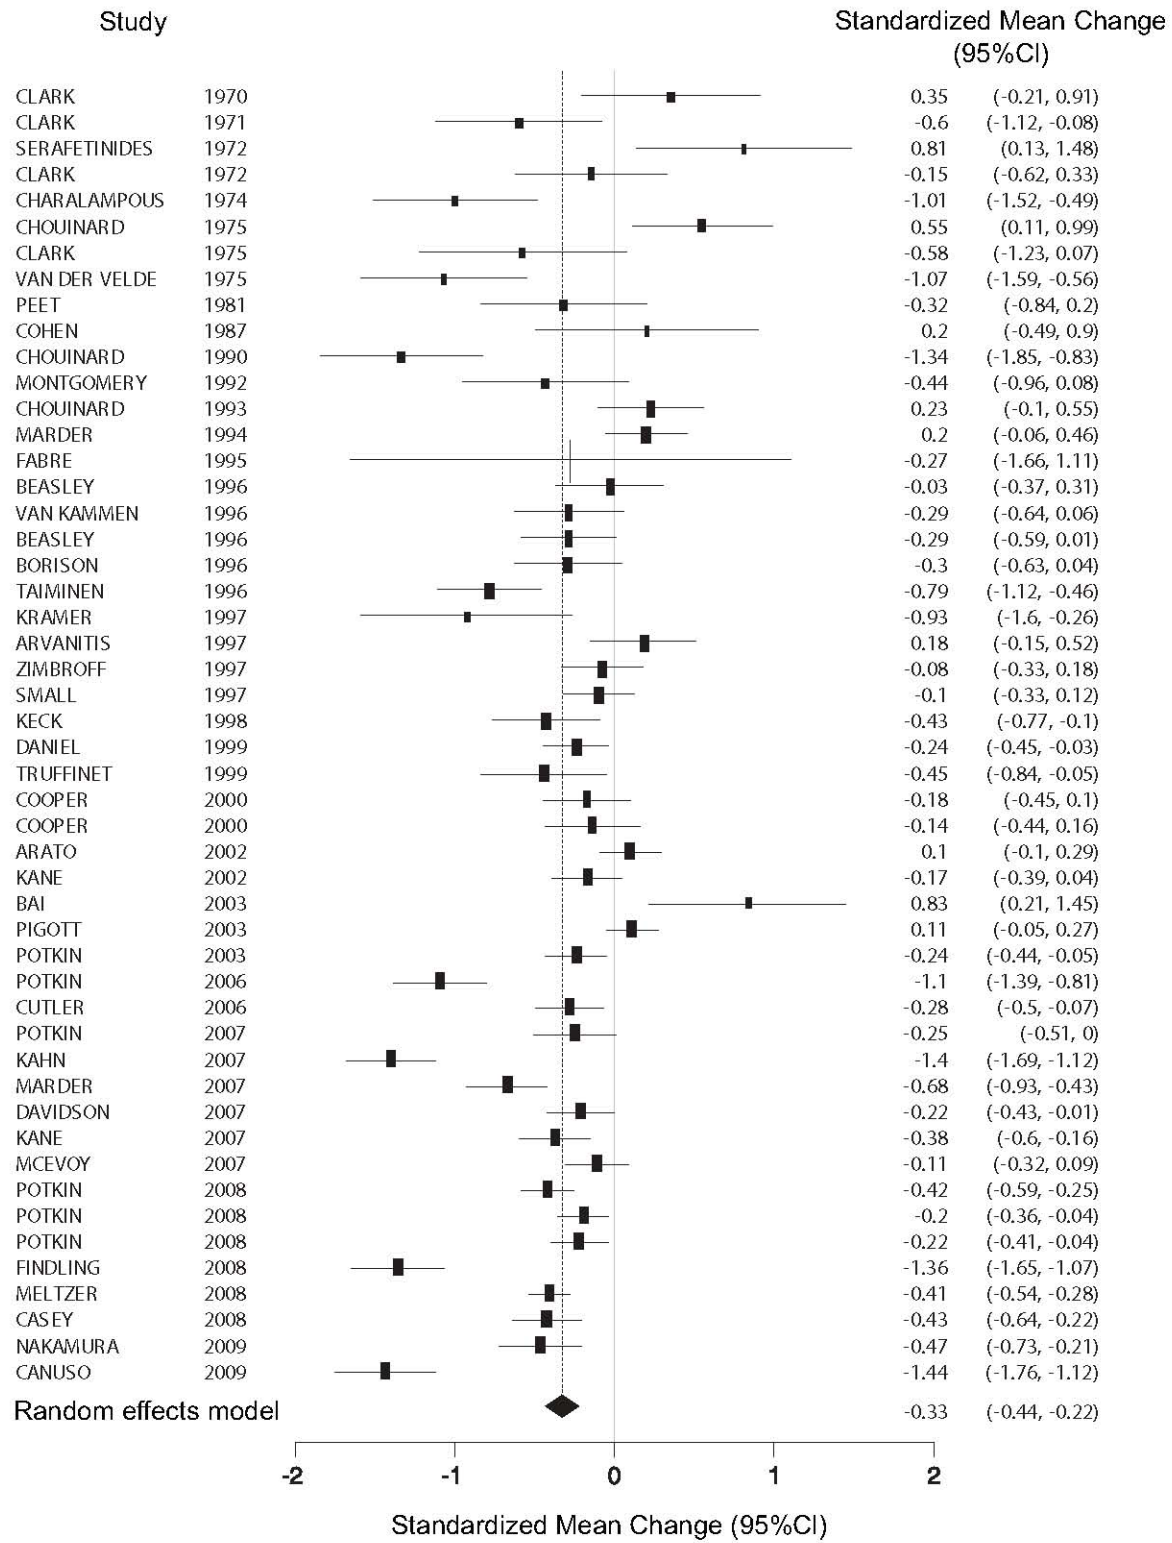

Figure S2. Funnel Plot for Assessing Publication Bias: Placebo Mean Change From Baseline (N=64 Studies)

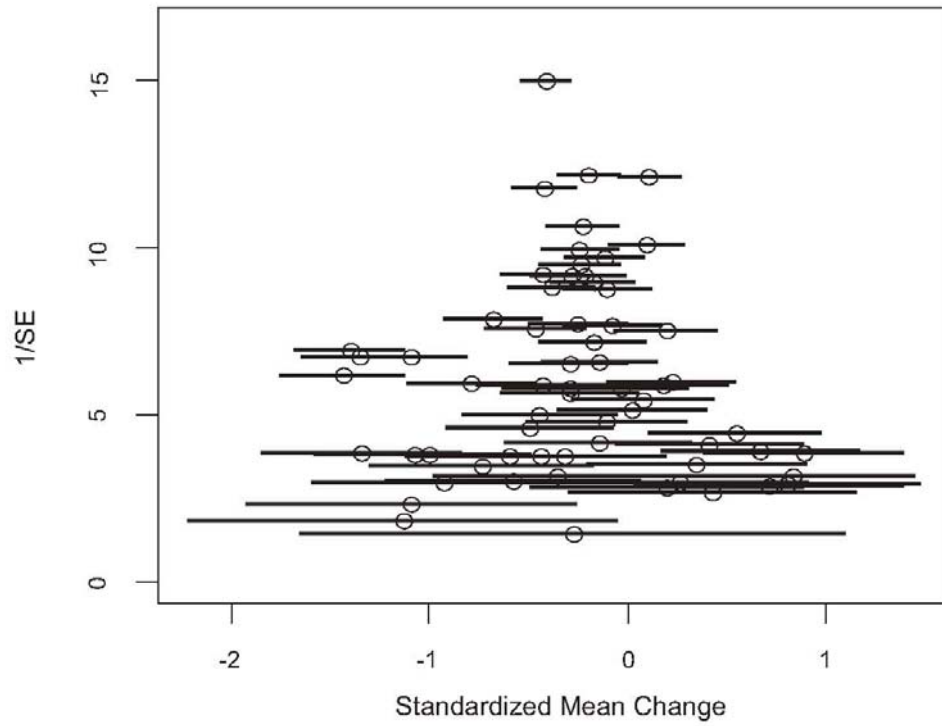

Symmetric funnel shape indicates publication bias is unlikely.

Figure S3. Placebo Standardized Mean Change (SMC) Over Time

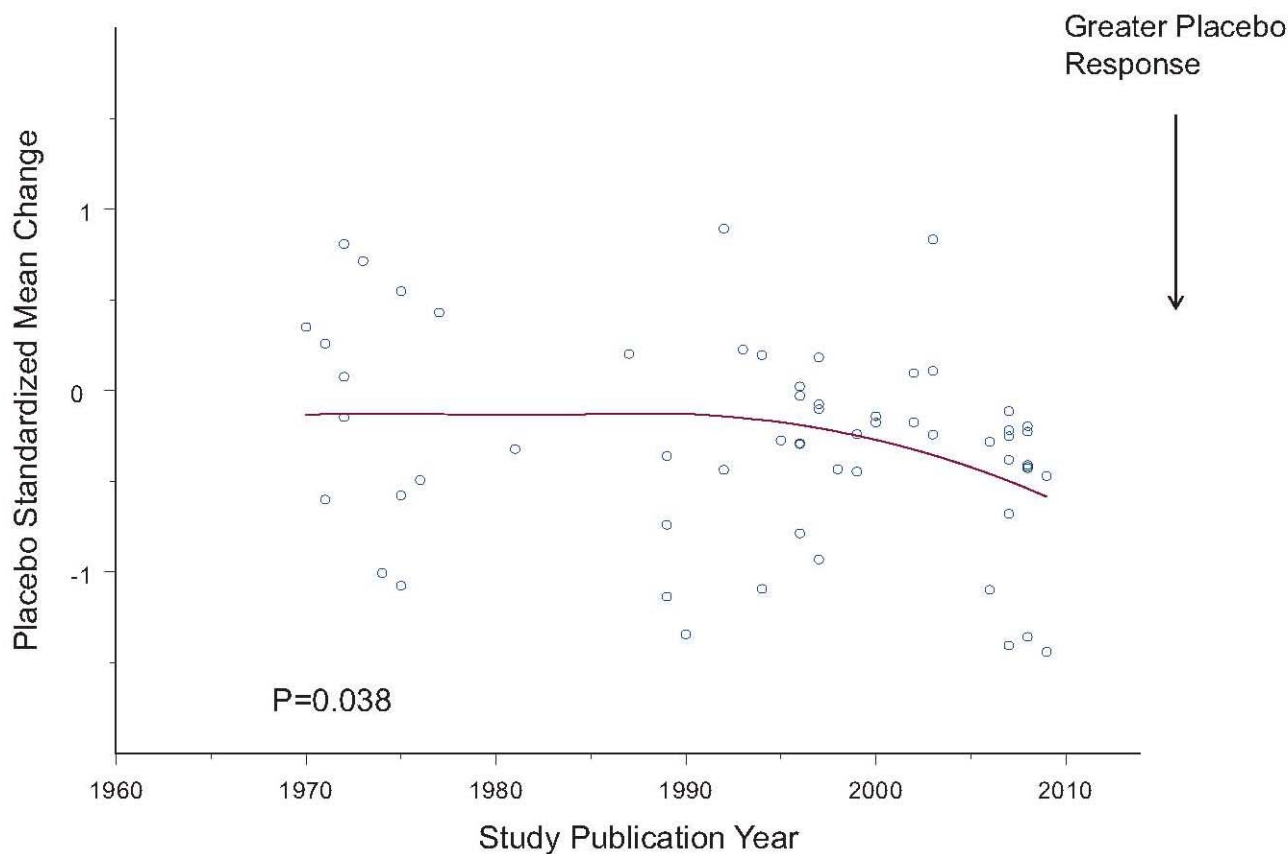

A greater influence of study year on placebo SMC was found in studies published after 1999 (regression coefficient= $-0.094$ ,  $SE=0.033$ ,  $p=0.004$ , likelihood square LR  $\chi^2=8.10$ ) compared to the time trend in 1970–1999 (regression coefficient= $-0.011$ ,  $SE=0.008$ ,  $p=0.195$ , LR  $\chi^2=1.68$ ). Moreover, the difference in time trend between the two periods was significant ( $-0.079$ ,  $SD=0.034$ ,  $p=0.019$ ,  $\chi^2=5.51$  for period-by-year interaction test). A sensitivity analysis was performed using 1993, an earlier cutoff year identified as the watershed year when the trend for increasing placebo response began (4). It showed consistent patterns with greater increase in placebo response in the more recent studies (1993–2010, regression coefficient= $-0.031$ ,  $p=0.028$ ) compared to that in the older studies (prior to 1993, regression coefficient= $-0.018$ ,  $p=0.230$ ). Likewise, similar placebo response patterns were observed after excluding the 11 studies with an omnibus quality rating score of 1 (“exceptionally poor”) or 2 (“very poor”), of which 9 were published in 1971–1992 and the remaining 2 in 1994–1996.

Figure S4. Placebo Response Vs. Number of Investigative Sites

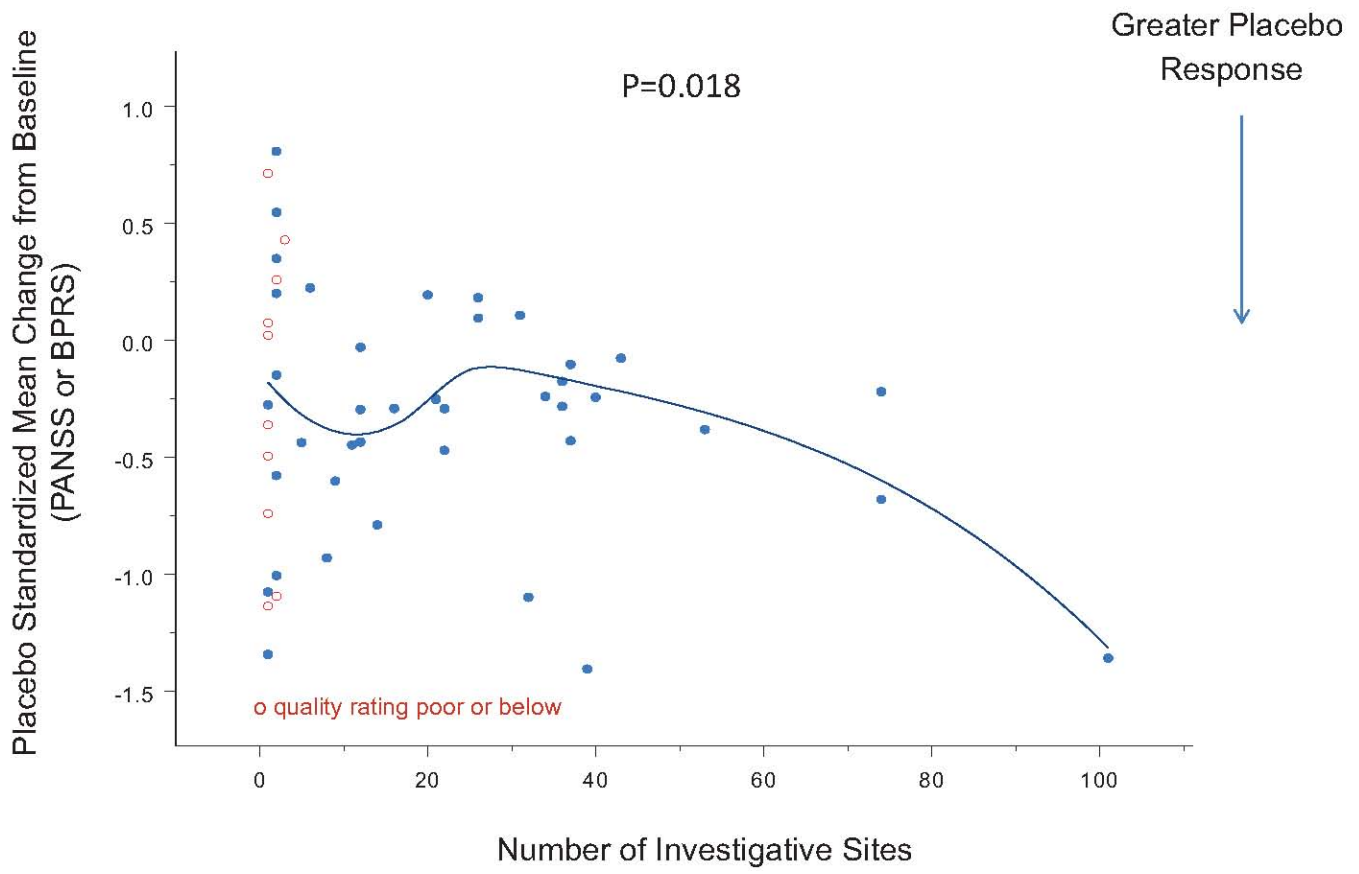

Figure S5. Placebo Response Vs. Percent Randomized to Placebo

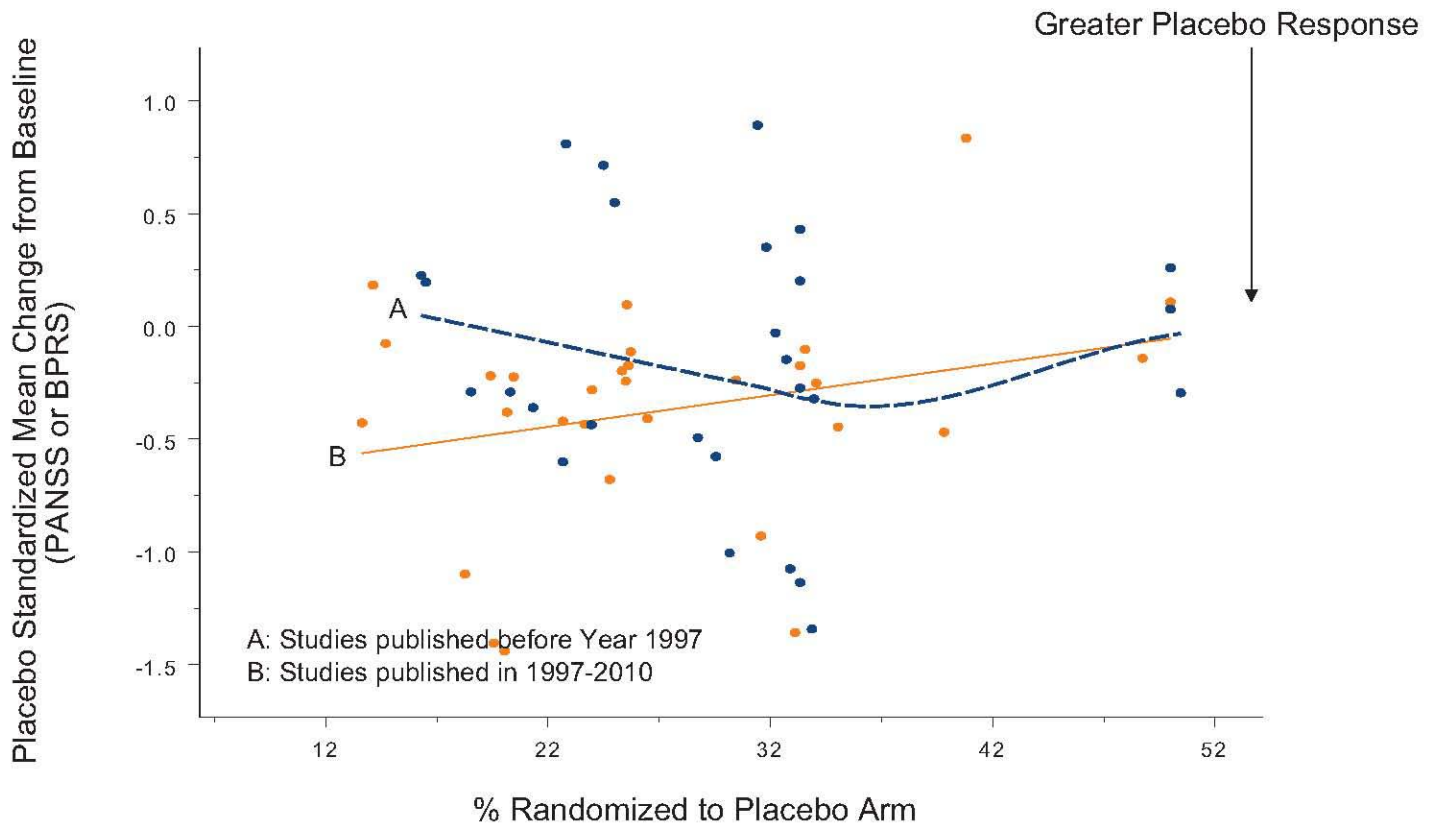

Increase in percentage of subjects randomized to placebo was associated with less placebo response (year 1998–2010), but not independent of study year influences.

## References

1. Selman FB, McClure RF, Helwig H: Loxapine succinate: a double-blind comparison with haloperidol and placebo in acute schizophrenics. *Curr Ther Res Clin Exp* 1976; 19:645–652
2. Arato M, O'Connor R, Meltzer H: The Ziprasidone Extended Use in Schizophrenia (ZEUS) study: a double-blind, placebo-controlled, 1-year clinical trial. *Int Clin Psychopharmacol*. 2002; 17:207–215
3. Cooper SJ, Butler A, Tweed J, Welch C, Raniwalla J: Zotepine in the prevention of recurrence: a randomised, double-blind, placebo-controlled study for chronic schizophrenia. *Psychopharmacology* 2000; 150:237–243
4. Pigott TA, Carson WH, Saha AR, Torbeyns AF, Stock EG, Ingenito GG; Aripiprazole Study Group: Aripiprazole for the prevention of relapse in stabilized patients with chronic schizophrenia: a placebo-controlled 26-week study. *J Clin Psychiatry* 2003; 64:1048–1056
5. Kocsis JH, Gerber AJ, Milrod B, Roose SP, Barber J, Thase ME, Perkins P, Leon AC: A new scale for assessing the quality of randomized clinical trials of psychotherapy. *Compr Psychiatry* 2010; 51:319-324
